# Supplementary material
Source: publisher figshare collection journal article supplement (https://acs.figshare.com/ndownloader/files/21728583)
Supplement: Supplementary file 1 [file 21728583]

Compound number																									Compound number	IC50 (µM) against P. Berghei	IC50 (nM) against PfNF54
3	O=C([C@@H]1C=C(C)C(O)[C@]2([H])[C@@]1(O)/C(CO2)=C/C=C/[C@H](C)[C@H](O)/C(C)=C/C3)O[C@H]4C[C@]3([H])O[C@]5(O[C@H]([C@H](C)CC)[C@@H](C)CC5)C4																								3	4.557 ± 1.981
5	O=C([C@@H]1C=C(C)C(O[Si](C)(C)C(C)(C)C)[C@]2([H])[C@@]1(O)/C(CO2)=C/C=C/[C@H](C)[C@H](O)/C(C)=C/C3)O[C@H]4C[C@]3([H])O[C@]5(O[C@H]([C@H](C)CC)[C@@H](C)CC5)C4																								5
6	O=C([C@@H]1C=C(C)C(O[Si](C)(C)C(C)(C)C)[C@]2([H])[C@@]1(O)/C(CO2)=C/C=C/[C@H](C)[C@H](OC(CCl)=O)/C(C)=C/C3)O[C@H]4C[C@]3([H])O[C@]5(O[C@H]([C@H](C)CC)[C@@H](C)CC5)C4																								6
7	O=C([C@@H]1C=C(C)C(O[Si](C)(C)C(C)(C)C)[C@]2([H])[C@@]1(O)/C(CO2)=C/C=C/[C@H](C)[C@H](OC(CN=[N+]=[N-])=O)/C(C)=C/C3)O[C@H]4C[C@]3([H])O[C@]5(O[C@H]([C@H](C)CC)[C@@H](C)CC5)C4																								7
8	[][Fe][].C#Cc1cccc1.c2cccc2																								8
9	[][Fe][].C#CC(C=C1)=CC=C1c2cccc2.c3cccc3																								9
10a	O=C(OC(C)C)C1=C(C)N=C(OCC#C)N=C1C2=CC=CC([N+]([O-])=O)=C2																								10a
10b	O=C(OCC)C1=C(C)N=C(OCC#C)N=C1C2=C([N+]([O-])=O)C=C(OC)C(OC)=C2																								10b
10c	O=C(OCC)C1=C(C)N=C(OCC#C)N=C1C2=CC=CC=C2																								10c
11	O=C([C@@H]1C=C(C)C(O[Si](C)(C(C)(C)C)C)[C@]2([H])[C@@]1(O)/C(CO2)=C/C=C/[C@H](C)[C@H](OC(CN3C=C(c4cccc4)N=N3)=O)/C(C)=C/C5)O[C@H]6C[C@]5([H])O[C@]7(O[C@H]([C@H](C)CC)[C@@H](C)CC7)C6.[][Fe][].c8cccc8																								11
12	O=C([C@@H]1C=C(C)C(O[Si](C)(C(C)(C)C)C)[C@]2([H])[C@@]1(O)/C(CO2)=C/C=C/[C@H](C)[C@H](OC(CN3C=C(C(C=C4)=CC=C4c5cccc5)N=N3)=O)/C(C)=C/C6)O[C@H]7C[C@]6([H])O[C@]8(O[C@H]([C@H](C)CC)[C@@H](C)CC8)C7.[][Fe][].c9cccc9																								12
13	O=C(OC(C)C)C1=C(C)N=C(OCC(N=N2)=CN2CC(O[C@@H]([C@@H](C)/C=C/C=C(CO3)/[C@]4(O)[C@@]3([H])C(O[Si](C)(C(C)(C)C)C)C(C)=C[C@H]4C(O5)=O)/C(C)=C/C[C@]6([H])C[C@H]5C[C@@]7(O[C@H]([C@H](C)CC)[C@@H](C)CC7)O6)=O)N=C1C8=CC=CC([N+]([O-])=O)=C8																								13
14	O=C(OCC)C1=C(C)N=C(OCC(N=N2)=CN2CC(O[C@@H]([C@@H](C)/C=C/C=C(CO3)/[C@]4(O)[C@@]3([H])C(O[Si](C)(C(C)(C)C)C)C(C)=C[C@H]4C(O5)=O)/C(C)=C/C[C@]6([H])C[C@H]5C[C@@]7(O[C@H]([C@H](C)CC)[C@@H](C)CC7)O6)=O)N=C1C8=C([N+]([O-])=O)C=C(OC)C(OC)=C8																								14
15	O=C(OCC)C1=C(C)N=C(OCC(N=N2)=CN2CC(O[C@@H]([C@@H](C)/C=C/C=C(CO3)/[C@]4(O)[C@@]3([H])C(O[Si](C)(C(C)(C)C)C)C(C)=C[C@H]4C(O5)=O)/C(C)=C/C[C@]6([H])C[C@H]5C[C@@]7(O[C@H]([C@H](C)CC)[C@@H](C)CC7)O6)=O)N=C1C8=CC=CC=C8																								15
16	O=C([C@@H]1C=C(C)C(O)[C@]2([H])[C@@]1(O)/C(CO2)=C/C=C/[C@H](C)[C@H](OC(CN3C=C(c4cccc4)N=N3)=O)/C(C)=C/C5)O[C@H]6C[C@]5([H])O[C@]7(O[C@H]([C@H](C)CC)[C@@H](C)CC7)C6.[][Fe][].c8cccc8																								16	0.990 ± 0.068	256.7 ± 46.6
17	O=C([C@@H]1C=C(C)C(O)[C@]2([H])[C@@]1(O)/C(CO2)=C/C=C/[C@H](C)[C@H](OC(CN3C=C(C(C=C4)=CC=C4c5cccc5)N=N3)=O)/C(C)=C/C6)O[C@H]7C[C@]6([H])O[C@]8(O[C@H]([C@H](C)CC)[C@@H](C)CC8)C7.[][Fe][].c9cccc9																								17
18	O=C(OC(C)C)C1=C(C)N=C(OCC(N=N2)=CN2CC(O[C@@H]([C@@H](C)/C=C/C=C(CO3)/[C@]4(O)[C@@]3([H])C(O)C(C)=C[C@H]4C(O5)=O)/C(C)=C/C[C@]6([H])C[C@H]5C[C@@]7(O[C@H]([C@H](C)CC)[C@@H](C)CC7)O6)=O)N=C1C8=CC=CC([N+]([O-])=O)=C8																								18	0.911 ± 0.076	161.2 ± 40.49
19	O=C(OCC)C1=C(C)N=C(OCC(N=N2)=CN2CC(O[C@@H]([C@@H](C)/C=C/C=C(CO3)/[C@]4(O)[C@@]3([H])C(O)C(C)=C[C@H]4C(O5)=O)/C(C)=C/C[C@]6([H])C[C@H]5C[C@@]7(O[C@H]([C@H](C)CC)[C@@H](C)CC7)O6)=O)N=C1C8=C([N+]([O-])=O)C=C(OC)C(OC)=C8																								19	0.503 ± 0.002	50.2 ± 24.5
20	O=C(OCC)C1=C(C)N=C(OCC(N=N2)=CN2CC(O[C@@H]([C@@H](C)/C=C/C=C(CO3)/[C@]4(O)[C@@]3([H])C(O)C(C)=C[C@H]4C(O5)=O)/C(C)=C/C[C@]6([H])C[C@H]5C[C@@]7(O[C@H]([C@H](C)CC)[C@@H](C)CC7)O6)=O)N=C1C8=CC=CC=C8																								20	0.990 ± 0.050	110.5 ± 64
21	O=C(OCC)C1=C(C)NC(NC1C2=CC=C(OC)C(OC)=C2)=O																								21
22	O=C(OCC)C1=C(C)NC(N=C1C2=C([N+]([O-])=O)C=C(OC)C(OC)=C2)=O																								22
23	O=C(OCC)C1=C(C)N=C(Cl)N=C1C2=C([N+]([O-])=O)C=C(OC)C(OC)=C2																								23
